# Supplementary material
Source: PubMed Central journal article supplement (PMC6439766)
Supplement: jama-321-156-s002.pdf [file jama-321-156-s002.pdf]

## Supplementary Online Content

Costello SP, Hughes PA, Waters O, et al. Effect of fecal microbiota transplantation on 8-week remission in patients with ulcerative colitis: a randomized clinical trial. *JAMA*. doi:10.1001/jama.2018.20046

**eTable 1.** Donor Screening Criteria

**eTable 2.** 12-Month Clinical Follow-up of Ulcerative Colitis Patients

**eTable 3.** Patient Survey of Perception and Acceptability of FMT Prior to Undergoing FMT

**eTable 4.** Patient Perception and Acceptability of FMT 12 Months Following Donor FMT

**eTable 5.** Correlation of Immune Cell Populations With Baseline Total Mayo Score, Change in Total Mayo Score, and Donor Fecal Microbiota Transplantation Treatment Effect

eTable 6. Microbial Diversity Comparisons

**eTable 7.** Organisms Associated With a Change in Abundance Following Donor Fecal Microbiota Transplantation (FMT) as Compared to Autologous FMT at Weeks 4 and 8 (cut off  $p \leq .01$  at weeks 4 and 8)

**eTable 8.** Log Change From Baseline Abundance Following Donor Fecal Microbiota Transplantation at Weeks 4, 8, and 12 Months in the Species Listed in eTable 7

**eTable 9.** Organisms Whose Change in Abundance (A) Was Associated With Change in Total Mayo Score and (B) Differed by Treatment

**eTable 10.** Change in Short Chain Fatty Acids Levels From Baseline at Weeks 4 and 8 in Donor and Autologous FMT Groups

**eTable 11.** Associations Between Total Mayo Score at Baseline and Change in Mayo Score With Short Chain Fatty Acid Levels (at Baseline and Change, Respectively)

**eTable 12.** Mean Change in Mayo Score for the Two Treatment Groups for Each Baseline Factor, and the Linear Mixed Effects Regression Estimated *P* Value for the Pairwise Interaction

**eTable 13.** Mean Blood Measures at Baseline and Week 8 and the Comparison in the Change Over Time Between Treatment Groups

**eTable 14.** 12-Month Adverse Events

**eTable 15.** Fecal Calprotectin Level Relative to Baseline at Week 4 and Week 8 (Log Transformed)

**eTable 16.** Baseline and Week 8 Data for Patients Randomized to Autologous Fecal Microbiota Transplantation

**eTable 17.** Baseline and Week 8 Data for Patients Randomized to Donor Fecal Microbiota Transplantation

**eTable 18.** 12-Month Data for Patients Randomized to Autologous Fecal Microbiota Transplantation

**eTable 19.** Baseline and 12-Month Data for Patients Randomized to Donor Fecal Microbiota Transplantation

**eTable 20.** Change Due to Treatment in Butyrate Producing Species and Genera

**eFigure.** Butyrate Producing Bacteria Prevalence in Donors (Individual and Pooled) and Patients Prior to, Then 4 and 8 Weeks After Donor Fecal Microbiota Transplantation

**eAppendix 1.** Bacterial Analysis Methods

**eAppendix 2.** Bioinformatics

**eAppendix 3.** Flow Cytometry

**eAppendix 4.** Statistical Analysis

**eAppendix 5.** Patient Perception of Faecal Transplantation for Ulcerative Colitis Questionnaire

**eReferences**

This supplementary material has been provided by the authors to give readers additional information about their work.

**eTable 1.** Donor Screening Criteria

**Medical interview (exclusions)**

Age: <18 or >65

Antimicrobial therapy or probiotics in the past 6 months

Active medical illness or symptoms

Any medications (other than oral contraceptive pill)

International travel in last 1 months to areas at high risk of travelers' diarrhea

High risk sexual activity (unprotected sex in last 1 month outside of a monogamous relationship)

Illicit drug use

Known HIV or viral hepatitis exposure in the last 12 months

Incarceration or a history of incarceration.

**Medical history and Examination (exclusions)**

Any gastrointestinal disorder

Obesity (BMI>30), hypertension, type 2 diabetes and dyslipidaemia

Malnutrition (BMI <18)

Autoimmune disease

Atopic disease

Depression

Infection with HIV, Syphilis, Hepatitis B or C

Malignancy

Chronic pain syndromes, neurologic or neurodevelopmental disorders

**eTable 1.** Donor Screening Criteria(Continued)

**Blood screening**

Full blood count

Electrolytes, Urea and Creatinine

Liver function tests

Human T-cell lymphotropic virus 1 and 2 serology

Epstein Barr Virus IgM and IgG

Cytomegalovirus IgM and IgG

Syphilis (Rapid plasma reagin)

*Strongyloides stercoralis*, *Entamoeba histolytica*, *Helicobacter pylori* serology

Hepatitis A virus IgM

Hepatitis B surface antigen and core antibody, Hepatitis C virus antibody

HIV PCR

Fasting lipids and Blood sugar level

C-Reactive Protein and Erythrocyte Sedimentation Rate

**Stool screening** Microscopy

and Culture *Clostridium*

*difficile* toxin PCR

Egg, cysts and parasites (including *Cryptosporidium* spp., *Giardia* spp., *Dientamoeba*

*fragilis* and *Entamoeba histolytica* PCR)

**eTable 2.** 12-Month Clinical Follow-up of Ulcerative Colitis Patients

| Remission definition                                                               | Randomized Group  | Number(%)                     |                                              |
|------------------------------------------------------------------------------------|-------------------|-------------------------------|----------------------------------------------|
|                                                                                    |                   | Remission 12-month assessment | Remission and no UC symptoms since donor FMT |
| Clinical and endoscopic remission <sup>a</sup>                                     | dFMT              | 11/26 (42)                    | 4/26 (7)                                     |
|                                                                                    | aFMT <sup>b</sup> | 10/17 (58)                    | 5/17 (29)                                    |
|                                                                                    | Combined          | 21/43 (49)                    | 9/43 (21)                                    |
| Clinical remission <sup>c</sup>                                                    | dFMT              | 18/29 (62)                    | 5/29 (17)                                    |
|                                                                                    | aFMT <sup>b</sup> | 9/20 (45)                     | 4/20 (20)                                    |
|                                                                                    | Combined          | 27/49 (55)                    | 9/49 (18)                                    |
| Endoscopic remission <sup>d</sup>                                                  | dFMT              | 4/26 (15)                     | 1/26 (4)                                     |
|                                                                                    | aFMT <sup>b</sup> | 4/17 (23)                     | 3/17 (18)                                    |
|                                                                                    | Combined          | 8/43 (19)                     | 4/43 (9)                                     |
| Clinical and endoscopic remission at week 8 in donor FMT group (n=12) <sup>a</sup> |                   | 5/12 (42)                     | 3/12 (25)                                    |

Abbreviations: UC, ulcerative colitis; FMT, fecal microbiota transplantation; dFMT, donor fecal microbiota transplantation; aFMT, autologous fecal microbiota transplantation

<sup>a</sup> Clinical and endoscopic remission was defined as a Total Mayo score  $\leq 2$  and endoscopic Mayo score  $\leq 1$ )

<sup>b</sup> Due to aFMT patients crossing over at 8 weeks, 72 of 73 study patients had received donor FMT after 8-week time point.

<sup>c</sup> Clinical remission, was defined as a Simple Clinical Colitis Activity Index score  $\leq 2$

<sup>d</sup> Endoscopic remission was defined as an Endoscopic Mayo score equal to 0.

**eTable 3.** Patient Survey of Perception and Acceptability of FMT Prior to Undergoing FMT

| Question                                                                                               | Number (% of responders) |            |         |              |             | No response |
|--------------------------------------------------------------------------------------------------------|--------------------------|------------|---------|--------------|-------------|-------------|
|                                                                                                        | Impossible               | Not likely | Unsure  | Quite likely | Very likely |             |
| Do you believe that FMT is likely to help with your symptoms? (n=69)                                   | 0 (0)                    | 0(0)       | 25 (36) | 36 (52)      | 8 (12)      | 4           |
| Do you consider that FMT is likely to be safe? (n=69)                                                  | 0(0)                     | 0(0)       | 10 (14) | 45 (65)      | 14 (20)     | 4           |
| Do you consider that 5-ASA medication (e.g. sulfasalazine, mesalazine) is likely to be safe? (n=69)    | 6 (9)                    | 7 (10)     | 18 (26) | 26 (38)      | 12 (17)     | 4           |
| Do you consider that steroid medication (e.g. prednisolone) is likely to be safe? (n=69)               | 9 (13)                   | 33 (48)    | 13 (19) | 12 (17)      | 2 (3)       | 4           |
| Do you consider that thiopurine medication (e.g. azathioprine/ 6-Mercaptopurine) is likely to be safe? | 3 (4)                    | 31 (46)    | 22 (32) | 10 (15)      | 2 (3)       | 5           |
| Do you consider that methotrexate medication is likely to be safe? (n=67)                              | 3 (4)                    | 20 (30)    | 41 (61) | 3 (4)        | 0(0)        | 6           |
| Do you consider that anti-TNF medication (e.g. infliximab/adalimumab) is likely to be safe? (n=68)     | 6 (9)                    | 12 (18)    | 45 (66) | 5 (7)        | 0(0)        | 5           |
| Do you consider that surgical removal of the colon is likely to be safe? (n=69)                        | 3 (4)                    | 32 (46)    | 24 (35) | 10 (14)      | 0(0)        | 4           |

Abbreviations: FMT, fecal microbiota transplantation; 5-ASA, 5-aminosalicylate; TNF, tumor necrosis factor alpha

**eTable 3.** Patient Survey of Perception and Acceptability of FMT Prior to Undergoing FMT (Continued)

| Question                                                                                                                 | Number (% of responders) |         |         | No Response |
|--------------------------------------------------------------------------------------------------------------------------|--------------------------|---------|---------|-------------|
|                                                                                                                          | Yes                      | No      | Unsure  |             |
| Do you believe FMT as carried out in this study would be seen as acceptable by the general Australian population? (n=66) | 29 (44)                  | 9 (14)  | 28 (42) | 7           |
| Do you believe FMT as carried out in this study would be seen as acceptable by patients with ulcerative colitis (n=68)   | 65 (96)                  | 0 (0)   | 3 (4)   | 5           |
| Do you have any cultural or religious concerns about receiving fecal material from another person? (n=69)                | 0 (0)                    | 65 (94) | 3 (4)   | 5           |
| Do you have any concerns about discussion FMT with friends or family? (n=63)                                             | 19 (30)                  | 44 (70) | 0 (0)   | 10          |

Abbreviations: FMT, fecal microbiota transplantation

**eTable 4.** Patient Perception and Acceptability of FMT 12 Months Following Donor FMT

| Question                                                                                                       | Number (% of responders) |              |              |              |                | No response |
|----------------------------------------------------------------------------------------------------------------|--------------------------|--------------|--------------|--------------|----------------|-------------|
|                                                                                                                | Not at all               | Yes (at all) | Yes a little | Yes a lot    | Unsure         |             |
| Do you believe that FMT helped with your symptoms at least temporarily? (n=61)                                 | 17 (28)                  | 38 (62)      | 17 (28)      | 21 (34)      | 6 (10)         | 12          |
|                                                                                                                | Increased                | Decreased    | The same     | Unsure       | Not applicable | No response |
| Has your medication requirement decreased or increased in the 12 months since FMT? (n=60)                      | 10 (17)                  | 18 (30)      | 30 (50)      | 2 (3)        | 0 (0)          | 13          |
| Has the amount of steroid medication changed in the 12 months post FMT compared to the 12 months prior? (n=60) | 7 (12)                   | 25 (42)      | 12 (20)      | 2 (3)        | 14 (23)        | 13          |
|                                                                                                                | Impossible               | Not likely   | Unsure       | Quite Likely | Very likely    | No response |
| Do you consider that FMT is likely to be safe? (n=60)                                                          | 0                        | 0            | 12 (20)      | 19 (32)      | 29 (48)        | 13          |

Abbreviations: FMT, fecal microbiota transplantation



**eTable 4.** Patient Survey of Perception and Acceptability of FMT 12 Months Following FMT (Continued)

| Question                                                                                                                                  | Number (% of responders) |         |         | No response |
|-------------------------------------------------------------------------------------------------------------------------------------------|--------------------------|---------|---------|-------------|
|                                                                                                                                           | Yes                      | No      | Unsure  |             |
| Do you believe FMT as carried out in this study would be seen as acceptable by the general Australian population? (n=59)                  | 30 (52)                  | 8 (14)  | 21 (36) | 14          |
| Do you believe FMT as carried out in this study would be acceptable to patients with ulcerative colitis? (n=60)                           | 57 (95)                  | 0       | 3 (5)   | 13          |
| Do you have any cultural or religious concerns about receiving fecal material from another person? If yes, what are your concerns? (n=57) | 1 (2)                    | 56 (98) |         | 16          |
| Do you have any concerns about discussing FMT with friends or family? (n=60)                                                              | 5 (8)                    | 55 (92) |         | 13          |
| Have you required hospitalization in the 12 months after FMT? (n=61)                                                                      | 18 (30)                  | 43 (70) |         | 12          |
| Did you require surgery (colectomy) for your Ulcerative colitis since your FMT (n=69)                                                     | 9 (13)                   | 60 (87) |         | 4           |

Abbreviations: FMT, fecal microbiota transplantation

**eTable 5.** Correlation of Immune Cell Populations With Baseline Total Mayo Score, Change in Total Mayo Score, and Donor Fecal Microbiota Transplantation Treatment Effect

| Immune cell population                  | Flow cytometry marker | Baseline Total Mayo Score |         | Mayo Change from Baseline to week 8 |         | Donor FMT treatment    |         | Donor FMT adjusted for total Mayo score |         |
|-----------------------------------------|-----------------------|---------------------------|---------|-------------------------------------|---------|------------------------|---------|-----------------------------------------|---------|
|                                         |                       | Est [95% CI]              | P Value | Est [95% CI]                        | P Value | Est [95% CI]           | P Value | Est [95% CI]                            | P Value |
| <b>Lamina Propria Mononuclear Cells</b> |                       |                           |         |                                     |         |                        |         |                                         |         |
| <b>γδ T cell</b>                        | CD3+ gamma delta T+   | -0.17 [-0.65 to 0.31]     | .48     | -0.3 [-1 to 0.41]                   | .42     | -0.51 [-1.2 to 0.19]   | .16     | -0.49 [-1.2 to 0.27]                    | .21     |
| <b>Natural killer cell</b>              | CD19/CD20- CD16/CD56+ | -0.5 [-0.91 to -0.099]    | .02     | -0.39 [-0.84 to 0.05]               | .11     | 0.022 [-0.74 to 0.78]  | .95     | -0.25 [-1.1 to 0.57]                    | .55     |
| <b>Natural Killer T cell</b>            | CD3+ NKT+             | -0.21 [-0.66 to 0.25]     | .36     | -0.43 [-1 to 0.15]                  | .18     | -0.43 [-1.1 to 0.23]   | .2      | -0.47 [-1.2 to 0.26]                    | .21     |
| <b>Memory T cell</b>                    | CD3+ve CD45RO+ve      | 0.34 [-0.16 to 0.83]      | .18     | 0.18 [-0.61 to 0.97]                | .66     | -0.21 [-0.65 to 0.23]  | .35     | 0.05 [-0.4 to 0.5]                      | .83     |
| <b>B cells</b>                          | CD19+/CD20+ CD45RO-   | 0.46 [0.057 to 0.87]      | .03     | 0.67 [0.13 to 1.2]                  | .03     | -0.053 [-0.82 to 0.71] | .89     | 0.37 [-0.35 to 1.1]                     | .31     |

Abbreviations: FMT, fecal microbiota transplantation

**eTable 5.** Correlation of Immune Cell Populations With Baseline Total Mayo Score, Change in Total Mayo Score, and Donor Fecal Microbiota Transplantation Treatment Effect (Continued)

| Immune cell population                  | Flow cytometry marker           | Baseline Total Mayo Score |         | Mayo Change from Baseline to week 8 |         | Donor FMT treatment   |         | Donor FMT adjusted for total Mayo score |         |
|-----------------------------------------|---------------------------------|---------------------------|---------|-------------------------------------|---------|-----------------------|---------|-----------------------------------------|---------|
|                                         |                                 | Est [95% CI]              | P Value | Est [95% CI]                        | P Value | Est [95% CI]          | P Value | Est [95% CI]                            | P Value |
| <b>Lamina Propria Mononuclear Cells</b> |                                 |                           |         |                                     |         |                       |         |                                         |         |
| <b>Macrophage</b>                       | Lineage- HLA-DR+ CD33+ SSC+     | 0.26 [-0.26 to 0.77]      | .33     | -0.00032 [-0.61 to 0.61]            | 1       | -0.36 [-0.9 to 0.19]  | .20     | -0.22 [-0.84 to 0.41]                   | .49     |
| <b>Dendritic</b>                        | Lineage- HLA-DR+ CD11c+ CD33+ve | 0.43 [0.042 to 0.82]      | .03     | 0.36 [-0.08 to 0.81]                | .13     | -0.14 [-0.76 to 0.47] | .64     | 0.24 [-0.41 to 0.9]                     | .46     |
| <b>Helper T cell</b>                    | cd4 scc+                        | 0.11 [-0.34 to 0.57]      | .62     | -0.8 [-1.4 to -0.19]                | .03     | -0.17 [-0.63 to 0.29] | .47     | -0.31 [-0.8 to 0.18]                    | .22     |
| <b>Cytotoxic T cell</b>                 | cd8 scc+                        | -0.28 [-0.75 to 0.19]     | .24     | -0.62 [-1.2 to -0.026]              | .08     | -0.32 [-1.2 to 0.54]  | .46     | -0.37 [-1.3 to 0.53]                    | .42     |
| <b>T<sub>REG</sub> cell</b>             | cd4 scc+ CD25+FOXP3+            | 0.45 [-0.13 to 1]         | .13     | 1.1 [0.27 to 2]                     | .03     | -0.21 [-0.73 to 0.3]  | .41     | -0.056 [-0.59 to 0.48]                  | .84     |

Abbreviations: FMT, fecal microbiota transplantation

**eTable 5.** Correlation of Immune Cell Populations With Baseline Total Mayo Score, Change in Total Mayo Score, and Donor Fecal Microbiota Transplantation Treatment Effect (Continued)

| Immune cell population                               | Flow cytometry marker                          | Baseline Total Mayo Score |         | Mayo Change from Baseline to week 8 |         | Donor FMT treatment  |         | Donor FMT adjusted for total Mayo score |         |
|------------------------------------------------------|------------------------------------------------|---------------------------|---------|-------------------------------------|---------|----------------------|---------|-----------------------------------------|---------|
|                                                      |                                                | Est [95% CI]              | P Value | Est [95% CI]                        | P Value | Est [95% CI]         | P Value | Est [95% CI]                            | P Value |
| <b>Peripheral Blood Mononuclear cells</b>            |                                                |                           |         |                                     |         |                      |         |                                         |         |
| <b>Guthoming T<sub>HELPER</sub> cell (blood)</b>     | CD4+ CD8- CD45RO+ β <sub>7</sub> +             | -0.057 [-0.45 to 0.34]    | .78     | 0.01 [-0.57 to 0.59]                | .97     | 0.47 [0.053 to 0.88] | .03     | 0.45 [0.0088 to 0.89]                   | .05     |
| <b>Guthoming T<sub>REGULATORY</sub> cell (blood)</b> | CD4+ CD8- CD45RO β <sub>7</sub> + CD25+ FOXP3+ | 0.029 [-0.7 to 0.76]      | .94     | 0.41 [-0.58 to 1.4]                 | .44     | -0.12 [-0.6 to 0.36] | .61     | -0.056 [-0.56 to 0.45]                  | .83     |

Abbreviations: FMT, fecal microbiota transplantation

**eTable 6.** Microbial Diversity Comparisons

| <b>Comparison of Diversity (number of operational taxonomic units)</b> | <b>Odds ratio (95%CI)</b> | <b>Pvalue</b> |
|------------------------------------------------------------------------|---------------------------|---------------|
| Baseline UC patients vs individual stool donors                        | 0.65 (0.53 to 0.80)       | <.001         |
| Pooled donor stool vs individual donor stool                           | 1.89 (1.44 to 2.48)       | <.001         |
| UC patients week 4 dFMT vs aFMT                                        | 1.35 (1.11 to 1.64)       | .002          |
| UC patients week 8 dFMT vs aFMT                                        | 1.31 (1.08 to 1.60)       | .006          |
| UC Patients at 12-months following open label donor FMT vs baseline    | 1.17 (1.10 to 1.24)       | <.001         |
| UC Patients at 4 weeks following aFMT vs baseline                      | 0.92 (0.89 to 0.96)       | <.001         |
| UC Patients at 8 weeks following aFMT vs baseline                      | 0.94 (0.90 to 0.98)       | .001          |
| UC patients 12-months aFMT vs dFMT <sup>a</sup>                        | 0.98 (0.80 to 1.20)       | .82           |

Abbreviations: UC, ulcerative colitis; dFMT, donor fecal microbiota transplantation; aFMT, autologous fecal microbiota transplantation

a. 34 of 35 participants randomized to the autologous FMT group subsequently received donor FMT at week 8

**eTable 7.** Organisms Associated With a Change in Abundance Following Donor Fecal Microbiota Transplantation (FMT) as Compared to Autologous FMT at Weeks 4 and 8 (cut off  $p \leq .01$  at weeks 4 and 8)

| Species                                                         | Family                      | Phylum         | Week 4 Log change abundance $\beta$ [95%CI] | Week 4 P Value | Week 8 log change abundance $\beta$ [95%CI] | Week 8 P Value |
|-----------------------------------------------------------------|-----------------------------|----------------|---------------------------------------------|----------------|---------------------------------------------|----------------|
| <b>Association with increased abundance following donor FMT</b> |                             |                |                                             |                |                                             |                |
| <i>Peptococcus niger</i>                                        | Peptococcaceae <sup>1</sup> | Firmicutes     | 4.95 [3.18 to 6.73]                         | <.001          | 4.6 [2.86 to 6.34]                          | <.001          |
| <i>Faecalicoccus pleomorphus</i>                                | Erysipelotrichaceae         | Firmicutes     | 3.77 [2.17 to 5.37]                         | <.001          | 3.07 [1.47 to 4.68]                         | <.001          |
| <i>Olsenella</i> sp.                                            | Coriobacteriaceae           | Actinobacteria | 3.07 [1.96 to 4.17]                         | <.001          | 2.41 [1.33 to 3.49]                         | <.001          |
| <i>Acidaminococcus intestini</i>                                | Acidaminococcaceae          | Firmicutes     | 1.76 [0.73 to 2.8]                          | <.001          | 2.27 [1.23 to 3.31]                         | <.001          |
| <i>Senegalimassilia anaerobia</i>                               | Coriobacteriaceae           | Actinobacteria | 1.9 [0.88 to 2.92]                          | <.001          | 2.03 [1.02 to 3.04]                         | <.001          |
| <i>Prevotella copri</i>                                         | Prevotellaceae              | Bacteroidetes  | 2.16 [1.01 to 3.32]                         | <.001          | 2.03 [0.86 to 3.2]                          | <.001          |
| <i>Methanobrevibacter smithii</i>                               | Methanobacteriaceae         | Euryarchaeota  | 1.78 [0.57 to 3]                            | .004           | 1.65 [0.44 to 2.86]                         | .008           |
| <i>Clostridium methylpentosum</i>                               | Ruminococcaceae             | Firmicutes     | 2.03 [0.95 to 3.11]                         | <.001          | 1.57 [0.49 to 2.66]                         | .004           |
| <i>Alistipes indistinctus</i>                                   | Rikenellaceae               | Bacteroidetes  | 1.58 [0.67 to 2.5]                          | <.001          | 1.49 [0.58 to 2.4]                          | .001           |
| <i>Slackia isoflavoniconvertens</i>                             | Coriobacteriaceae           | Actinobacteria | 1.44 [0.55 to 2.32]                         | .002           | 1.44 [0.54 to 2.33]                         | .002           |
| <i>Odoribacter splanchnicus</i> strain                          | Porphyromonadaceae          | Bacteroidetes  | 1.18 [0.38 to 1.97]                         | .004           | 1.07 [0.26 to 1.87]                         | .009           |
| <b>Association with reduced abundance following donor FMT</b>   |                             |                |                                             |                |                                             |                |
| <i>Anaerostipes caccae</i>                                      | Lachnospiraceae             | Firmicutes     | -2.78 [-4.36 to -1.21]                      | <.001          | -2.53 [-4.23 to -0.84]                      | .003           |
| <i>Gordonibacter pamelaee</i>                                   | Coriobacteriaceae           | Actinobacteria | -1.46 [-2.37 to -0.54]                      | .002           | -1.7 [-2.65 to -0.76]                       | <.001          |
| <i>Clostridium aldenense</i>                                    | Lachnospiraceae             | Firmicutes     | -1.38 [-2.31 to -0.45]                      | .004           | -1.4 [-2.36 to -0.44]                       | .004           |

Abbreviation: FMT, Fecal microbiota transplantation

**eTable 8.** Log Change From Baseline Abundance Following Donor Fecal Microbiota Transplantation at Weeks 4, 8, and 12 Months in the Species Listed in eTable 7

| Species                                                                | Family              | Phylum         | Week 4 log change abundance [95%CI] | Week 4 P Value | Week 8 log change abundance [95%CI] | Week 8 P Value | 12-month log change abundance [95%CI] | 12-month P Value |
|------------------------------------------------------------------------|---------------------|----------------|-------------------------------------|----------------|-------------------------------------|----------------|---------------------------------------|------------------|
| <b>Positive Associations (increase in species following donor FMT)</b> |                     |                |                                     |                |                                     |                |                                       |                  |
| <i>Peptococcusniger</i>                                                | Peptococcaceae      | Firmicutes     | 4.05 [2.76 to 5.34]                 | <.001          | 3.79 [2.57 to 5]                    | <0.001         | 4.05 [2.49 to 5.6]                    | <.001            |
| <i>Faecalicoccuspleomorphus</i>                                        | Erysipelotrichaceae | Firmicutes     | 3.22 [2.07 to 4.38]                 | <.001          | 2.37 [1.23 to 3.5]                  | <0.001         | 1.93 [0.48 to 3.39]                   | .009             |
| Olsenella sp.                                                          | Coriobacteriaceae   | Actinobacteria | 2.17 [1.38 to 2.96]                 | <.001          | 1.59 [0.81 to 2.36]                 | <0.001         | 1.22 [0.24 to 2.19]                   | .01              |
| <i>Acidaminococcus intestini</i>                                       | Acidaminococcaceae  | Firmicutes     | 1.06 [0.34 to 1.79]                 | .004           | 1.1 [0.38 to 1.83]                  | 0.003          | 1.19 [0.24 to 2.15]                   | .01              |
| <i>Senegalimassiliaanaerobia</i>                                       | Coriobacteriaceae   | Actinobacteria | 1.62 [0.9 to 2.34]                  | <.001          | 1.69 [0.95 to 2.42]                 | <0.001         | 0.71 [-0.21 to 1.64]                  | .13              |
| <i>Prevotella copri</i>                                                | Prevotellaceae      | Bacteroidetes  | 1.69 [0.88 to 2.51]                 | <.001          | 2.08 [1.26 to 2.91]                 | <0.001         | 1.99 [0.89 to 3.1]                    | <.001            |
| <i>Methanobrevibacter smithii</i>                                      | Methanobacteriaceae | Euryarchaeota  | 1.32 [0.46 to 2.17]                 | .002           | 1.03 [0.18 to 1.88]                 | 0.02           | 0.46 [-0.67 to 1.58]                  | .43              |
| <i>Clostridium methylpentosum</i>                                      | Ruminococcaceae     | Firmicutes     | 0.87 [0.1 to 1.64]                  | .03            | 0.83 [0.05 to 1.61]                 | 0.04           | 1.14 [0.15 to 2.12]                   | .02              |
| <i>Alistipesindistinctus</i>                                           | Rikenellaceae       | Bacteroidetes  | 0.93 [0.29 to 1.58]                 | .004           | 0.68 [0.04 to 1.31]                 | 0.04           | 1.29 [0.45 to 2.12]                   | .002             |
| <i>Slackia isoflavoniconvertens</i>                                    | Coriobacteriaceae   | Actinobacteria | 0.8 [0.17 to 1.42]                  | .01            | 0.79 [0.15 to 1.43]                 | 0.01           | 0.73 [-0.13 to 1.59]                  | .10              |
| <i>Odoribacter splanchnicus</i>                                        | Porphyromonadaceae  | Bacteroidetes  | 0.29 [-0.27 to 0.85]                | .31            | 0.52 [-0.04 to 1.08]                | 0.07           | 0.91 [0.19 to 1.63]                   | .01              |

Abbreviation: FMT, fecal microbiota transplantation

**eTable 8.** Log Change From Baseline Abundance Following Donor Fecal Microbiota Transplantation at Weeks 4, 8, and 12 Months in the Species Listed in eTable 7 (Continued)

| Species                                                                | Family            | Phylum         | Week 4 log change abundance [95%CI] | Week 4 P Value | Week 8 log change abundance [95%CI] | Week 8 P Value | 12-month log change abundance [95%CI] | 12-month P Value |
|------------------------------------------------------------------------|-------------------|----------------|-------------------------------------|----------------|-------------------------------------|----------------|---------------------------------------|------------------|
| <b>Negative Associations (decrease in species following donor FMT)</b> |                   |                |                                     |                |                                     |                |                                       |                  |
| <i>Anaerostipes caccae</i>                                             | Lachnospiraceae   | Firmicutes     | -2.24 [-3.47 to -1.01]              | <.001          | -2.43 [-3.74 to -1.11]              | <0.001         | 1.98 [0.69 to 3.26]                   | .003             |
| <i>Gordonibacter pamelaee</i>                                          | Coriobacteriaceae | Actinobacteria | -0.99 [-1.65 to -0.33]              | .003           | -1.39 [-2.08 to -0.7]               | <0.001         | -0.28 [-1.18 to 0.62]                 | .54              |
| <i>Clostridiumaldenense</i>                                            | Lachnospiraceae   | Firmicutes     | -0.9 [-1.59 to -0.21]               | .01            | -1.15 [-1.86 to -0.44]              | 0.002          | 1.01 [0.21 to 1.82]                   | .01              |

Abbreviation: FMT, fecal microbiota transplantation



**eTable 9.** Organisms Whose Change in Abundance (A) Was Associated With Change in Total Mayo Score and (B) Differed by Treatment

| Species                                                                    | Family             | Phylum         | Total Mayo score<br>Change <sup>a</sup> [95%CI] | P<br>Value | Treatment<br>difference<br>log change <sup>b</sup> [95%CI] | P Value |
|----------------------------------------------------------------------------|--------------------|----------------|-------------------------------------------------|------------|------------------------------------------------------------|---------|
| <b>Species associated with Mayo score decrease(diseaseimprovement)</b>     |                    |                |                                                 |            |                                                            |         |
| <i>Anaerofilum pentosovorans</i>                                           | Ruminococcaceae    | Firmicutes     | -1.08 [-1.51 to-0.64]                           | <.001      | 1.41 [0.51 to2.32]                                         | .002    |
| <i>Bacteroides coprophilus</i>                                             | Bacteroidaceae     | Bacteroidetes  | -0.89 [-1.23 to-0.55]                           | <.001      | 2.84 [0.14 to5.53]                                         | .04     |
| <i>Clostridium methylpentosum</i>                                          | Ruminococcaceae    | Firmicutes     | -0.63 [-1.1 to-0.15]                            | .01        | 1.84 [0.97 to2.72]                                         | <.001   |
| <i>Acidaminococcus intestini</i>                                           | Acidaminococcaceae | Firmicutes     | -0.55 [-1.01 to-0.08]                           | .03        | 1.93 [1.14 to2.73]                                         | <.001   |
| <i>Senegalimassilia anaerobia</i>                                          | Coriobacteriaceae  | Actinobacteria | -0.51 [-1.01 to-0.01]                           | .05        | 1.84 [0.97 to2.72]                                         | <.001   |
| <b>Species associated with Mayo score increase (disease deterioration)</b> |                    |                |                                                 |            |                                                            |         |
| <i>Fusicatenibacter saccharivorans</i> <sup>c</sup>                        | Lachnospiraceae    | Firmicutes     | 0.58 [0.07 to1.09]                              | .03        | -0.67 [-1.11 to-0.23]                                      | .003    |
| <i>Paraprevotella xylaniphila</i> <sup>d</sup>                             | Prevotellaceae     | Bacteroidetes  | 0.5 [0.11 to0.89]                               | .02        | 0.83 [0.04 to1.63]                                         | .04     |

<sup>a</sup>Total Mayo change was defined as the change in total Mayo score per standard deviation in log abundance of organism (cut off  $p \leq .05$ ).

<sup>b</sup>Treatment difference log change was defined as organisms associated with a change in abundance following donor fecal microbiota transplantation as compared to autologous fecal microbiota transplantation at weeks 4 and 8 (cut off  $p \leq 0.05$ ).

<sup>c</sup>Treatment caused *Fusicatenibacter saccharivorans* to decrease and thereby it was associated with a higher Mayo score.

<sup>d</sup>Only *Paraprevotella xylaniphila* was associated in the incorrect direction, ie it increased after treatment and was positively associated with Mayo score change.

**eTable 10.** Change in Short Chain Fatty Acids Levels From Baseline at Weeks 4 and 8 in Donor and Autologous FMT Groups

| Short Chain fatty acid | Autologous FMT                  |                                 | Donor FMT                       |                                 | Treatment effect <i>P</i> value |
|------------------------|---------------------------------|---------------------------------|---------------------------------|---------------------------------|---------------------------------|
|                        | Week 4 vs 0 % baseline [95% CI] | Week 8 vs 0 % baseline [95% CI] | Week 4 vs 0 % baseline [95% CI] | Week 8 vs 0 % baseline [95% CI] |                                 |
| Acetate                | 114.0<br>[89.6 to 145.1]        | 88.8<br>[70.0 to 112.5]         | 98.5<br>[77.7 to 124.8]         | 107.4<br>[85.3 to 135.0]        | .75                             |
| Propionate             | 126.7<br>[96.6 to 166.0]        | 104.2<br>[79.8 to 136.1]        | 130.1<br>[98.4 to 171.9]        | 147.8<br>[112.5 to 194.2]       | .34                             |
| Butyrate               | 134.1<br>[99.3 to 181.0]        | 99.0<br>[73.7 to 132.9]         | 86.4<br>[64.3 to 116.1]         | 97.8<br>[73.5 to 130.2]         | .47                             |
| Iso-Butyrate           | 142.3 [108.2 to 187.1]          | 107.7<br>[82.2 to 140.9]        | 93.7<br>[70.9 to 123.9]         | 115.0<br>[87.6 to 150.9]        | .11                             |
| valerate               | 90.3<br>[64.3 to 126.9]         | 81.6<br>[58.4 to 114.2]         | 119.3<br>[85.5 to 166.6]        | 142.9<br>[103.2 to 197.8]       | .41                             |
| Iso-Valerate           | 136.8<br>[102.2 to 182.9]       | 95.8<br>[72.0 to 127.6]         | 93.7<br>[69.5 to 126.3]         | 113.1<br>[84.5 to 151.3]        | .46                             |
| Caproate               | 108.7<br>[79.8 to 148.1]        | 89.3<br>[65.9 to 121.1]         | 125.9<br>[91.8 to 172.7]        | 111.8<br>[82.1 to 152.3]        | .51                             |

Abbreviations: FMT, fecal microbiota transplantation

**eTable 11.** Associations Between Total Mayo Score at Baseline and Change in Mayo Score With Short Chain Fatty Acid Levels (at Baseline and Change, Respectively)

|              | Baseline Mayo           |        | Mayo Change          |        |
|--------------|-------------------------|--------|----------------------|--------|
|              | Est [95% CI]            | PValue | Est [95% CI]         | PValue |
| Acetate      | -0.015 [-0.45 to 0.42]  | .95    | -0.23 [-1.3 to 0.83] | .67    |
| Propionate   | -0.0092 [-0.36 to 0.35] | .96    | -0.19 [-0.98 to 0.6] | .64    |
| Butyrate     | -0.036 [-0.38 to 0.3]   | .83    | -0.14 [-1 to 0.75]   | .75    |
| Iso-butyrate | 0.024 [-0.35 to 0.39]   | .90    | -0.42 [-1.3 to 0.5]  | .38    |
| Valerate     | -0.078 [-0.42 to 0.26]  | .65    | -0.39 [-1.3 to 0.55] | .42    |
| Iso-valerate | 0.027 [-0.34 to 0.4]    | .88    | -0.48 [-1.3 to 0.37] | .27    |
| Caproate     | -0.13 [-0.57 to 0.31]   | .55    | -0.48 [-1.6 to 0.65] | .41    |

**eTable 12.** Mean Change in Mayo Score for the Two Treatment Groups for Each Baseline Factor, and the Linear Mixed Effects Regression Estimated *P* Value for the Pairwise Interaction<sup>a</sup>

|                              |            | Mayo scoreChange |            | Interaction        |
|------------------------------|------------|------------------|------------|--------------------|
|                              |            | Autologous FMT   | Donor FMT  | LME <i>P</i> value |
| Sex                          | Male       | -1.2 (2.0)       | -3.4 (2.6) | .79                |
|                              | Female     | -1.2 (2.4)       | -3.7 (2.4) |                    |
| Age at diagnosis (years)     | Younger    | -1.4 (2.1)       | -3.6 (2.5) | .77                |
|                              | Older      | -1.1 (2.3)       | -3.4 (2.6) |                    |
| Age at randomization (years) | Younger    | -1.9 (2.0)       | -3.8 (2.4) | .12                |
|                              | Older      | -0.5 (2.1)       | -3.3 (2.7) |                    |
| Duration of disease (years)  | Shorter    | -1.6 (1.7)       | -3.2 (2.9) | .1                 |
|                              | Longer     | -0.9 (2.5)       | -3.8 (2.1) |                    |
| Disease extent               | Pancolitis | -0.8 (2.0)       | -3.7 (2.5) | .34                |
|                              | Left sided | -1.5 (2.2)       | -3.4 (2.6) |                    |
| Oral steroids                | No         | -1.6 (1.9)       | -3.1 (2.3) | .01                |
|                              | Yes        | -0.5 (2.5)       | -5.7 (2.5) |                    |
| 5-ASA oral                   | No         | -1.3 (2.4)       | -2.2 (1.7) | .34                |
|                              | Yes        | -1.2 (2.1)       | -3.7 (2.6) |                    |
| 5-ASA topical                | No         | -1.2 (2.2)       | -3.5 (2.5) | .99                |
|                              | Yes        | -1.4 (1.8)       | -3.7 (2.7) |                    |
| Immunomodulator              | No         | -1.5 (2.1)       | -3.5 (2.9) | .61                |
|                              | Yes        | -0.9 (2.2)       | -3.5 (1.9) |                    |
| Biologics                    | No         | -1.1 (2.0)       | -3.5 (2.6) | .97                |
|                              | Yes        | -2.0 (3.2)       | -4.0 (1.0) |                    |

Abbreviations: LME, linear mixed effects model; 5-ASA, 5-aminosalicylate

<sup>a</sup> For presentation of means (SD) continuous predictors are divided by their population median scores.

**eTable 12.** Mean Change in Mayo Score for the Two Treatment Groups for Each Baseline Factor, and the Linear Mixed Effects Regression Estimated *P* Value for the Pairwise Interaction (Continued)<sup>a</sup>

|                           |       | Mayo scoreChange | Interaction | Mayo Change        |
|---------------------------|-------|------------------|-------------|--------------------|
|                           | Level | Autologous FMT   | Donor FMT   | LME <i>P</i> value |
| CRP (mg /L)               | Low   | -1.5 (1.9)       | -3.4 (2.1)  | .35                |
|                           | High  | -0.9 (2.4)       | -3.6 (2.9)  |                    |
| WBC (x10 <sup>9</sup> /L) | Low   | -1.7 (2.0)       | -3.6 (2.2)  | .97                |
|                           | High  | -1.0 (2.2)       | -3.3 (3.1)  |                    |
| Calprotectin (mg/kg)      | Low   | -1.4 (1.9)       | -3.2 (2.4)  | .23                |
|                           | High  | -1.1 (2.3)       | -3.9 (2.7)  |                    |
| Protein (g)               | Low   | -1.0 (1.9)       | -3.5 (2.8)  | .25                |
|                           | High  | -1.4 (2.4)       | -3.6 (2.2)  |                    |
| Carbohydrate(g)           | Low   | -1.2 (2.3)       | -3.4 (3.0)  | .49                |
|                           | High  | -1.3 (1.9)       | -3.6 (2.0)  |                    |
| Total fat(g)              | Low   | -1.1 (2.4)       | -3.5 (2.8)  | .43                |
|                           | High  | -1.3 (1.9)       | -3.6 (2.2)  |                    |
| Saturated fat(g)          | Low   | -1.4 (2.6)       | -3.6 (2.8)  | .26                |
|                           | High  | -1.1 (1.7)       | -3.4 (2.2)  |                    |
| Sugars (g)                | Low   | -1.4 (2.4)       | -3.8 (3.1)  | .91                |
|                           | High  | -1.1 (1.8)       | -3.2 (1.9)  |                    |
| Starch (g)                | Low   | -0.7 (1.9)       | -3.9 (3.0)  | .47                |
|                           | High  | -1.9 (2.2)       | -3.2 (2.1)  |                    |
| Fiber (g)                 | Low   | -1.1 (1.8)       | -3.5 (2.8)  | .63                |
|                           | High  | -1.3 (2.4)       | -3.6 (2.2)  |                    |

Abbreviations: LME, linear mixed effects model; CRP, C-reactive protein; WBC, white blood cell; g, grams; mg, milligrams; kg, kilogram; L, litre

<sup>a</sup> For presentation of means (SD) continuous predictors are divided by their population median scores.

**eTable 12.** Mean Change in Mayo Score for the Two Treatment Groups for Each Baseline Factor, and the Linear Mixed Effects Regression Estimated *P* Value for the Pairwise Interaction (Continued)<sup>a</sup>

|              |              | <b>Mayo Change</b>   | <b>Interaction</b> | <b>Mayo Change</b>       |
|--------------|--------------|----------------------|--------------------|--------------------------|
|              | <b>Level</b> | <b>AutologousFMT</b> | <b>Donor FMT</b>   | <b>LME <i>P</i>value</b> |
| Calcium (mg) | Low          | -1.1 (1.7)           | -3.3 (2.7)         | .16                      |
|              | High         | -1.4 (2.6)           | -3.7 (2.4)         |                          |
| Iron (g)     | Low          | -0.9 (1.4)           | -3.3 (2.8)         | .87                      |
|              | High         | -1.5 (2.7)           | -3.7 (2.2)         |                          |
| Energy (kj)  | Low          | -1.4 (2.2)           | -3.2 (3.1)         | .25                      |
|              | High         | -1.1 (2.1)           | -3.8 (1.9)         |                          |
| Emulsifier   | Low          | -0.8 (1.9)           | -3.7 (3.0)         | .45                      |
|              | High         | -1.9 (2.3)           | -3.3 (1.9)         |                          |
| Sulphate     | Low          | -1.4 (2.2)           | -4.1 (3.0)         | .38                      |
|              | High         | -1.0 (2.1)           | -2.9 (1.8)         |                          |

Abbreviations: LME, linear mixed effects model; g, grams; kj, kilojoules

<sup>a</sup> For presentation of means (SD) continuous predictors are divided by their population median scores.

**eTable 13.** Mean Blood Measures at Baseline and Week 8 and the Comparison in the Change Over Time Between Treatment Groups

|                                         | Mean (%)       |                |             |             |         |
|-----------------------------------------|----------------|----------------|-------------|-------------|---------|
|                                         | Autologous FMT |                | Donor FMT   |             |         |
|                                         | Week 0         | Week 8         | Week 0      | Week 8      | P Value |
| Haemoglobin(g/L)                        | 142.1(17.6)    | 141<br>(21.6)  | 137.2(16.9) | 138.1(15.7) | .55     |
| Creatinine (umol/L)                     | 74.9(18.1)     | 75.9<br>(18.2) | 74.2(14.5)  | 75.3(14.9)  | .52     |
| Bilirubin (umol/L)                      | 14.7(9.3)      | 13.4 (8)       | 13.9(7.2)   | 13.9(6)     | .43     |
| Alkaline Phosphatase (U/L)              | 76.8(29.2)     | 80.7<br>(59.3) | 80.8(26.3)  | 84.8(35.7)  | .72     |
| Alanine Aminotransferase (U/L)          | 23.7 (9)       | 30 (19.7)      | 25.1 (13.3) | 32.6(43.5)  | .73     |
| White Blood Cells (x10 <sup>9</sup> /L) | 7.7 (2.4)      | 7.2 (2.6)      | 6.6 (2.3)   | 6.2 (1.9)   | .42     |
| Neutrophils (x10 <sup>9</sup> /L)       | 6.5 (8.7)      | 6.5 (10.9)     | 4.2 (1.8)   | 3.9 (1.7)   | .54     |
| C-Reactive Protein(mg/L)                | 6.8 (8.5)      | 7.4 (10.4)     | 6.5 (8.3)   | 5 (8.3)     | .38     |

Abbreviations: FMT, fecal microbiota transplantation; g, grams; L, liter

**eTable 14. 12-Month Adverse Events**

|                                          | Number(%) |
|------------------------------------------|-----------|
| Adverse effects                          | (n = 61)  |
| Worsening colitis                        | 13 (21)   |
| - Colectomy                              | 9 (15)    |
| - No Colectomy                           | 4 (7)     |
| Weightgain                               | 13 (21)   |
| Weight loss                              | 8 (13)    |
| Fecal incontinence                       | 2 (3)     |
| Infections                               |           |
| - Influenza                              | 2 (3)     |
| - <i>Clostridium difficile</i> infection | 2(3)      |
| - Sinusitis                              | 1 (2)     |
| - Pneumonia                              | 1 (2)     |
| - Wisdom tooth infection                 | 1 (2)     |
| - Respiratory virus                      | 1 (2)     |
| Immune related                           |           |
| - Psoriatic arthritis                    | 2 (3)     |
| - Crohn's disease                        | 1 (2)     |
| - Enteropathic arthritis                 | 1 (2)     |
| - Allergic reaction to infliximab        | 1 (2)     |
| Dermatitis                               | 1 (2)     |
| Backpain                                 | 1 (2)     |
| Skin petichiae                           | 1 (2)     |
| Urinary hesitancy                        | 1 (2)     |
| Asthma                                   | 1 (2)     |
| Diverticulitis                           | 1 (2)     |
| Oesophageal dysmotility                  | 1 (2)     |



**eTable 15.** Fecal Calprotectin Level Relative to Baseline at Week 4 and Week 8 (Log Transformed)

|             |        | <b>% of baseline fecal calprotectin [95%CI]</b> | <b>PValue</b> |
|-------------|--------|-------------------------------------------------|---------------|
| Donor FMT   | Week 4 | 47.0 [23.3,94.6]                                | .03           |
|             | Week 8 | 44.1 [22.4,87.2]                                | .02           |
| Placebo FMT | Week 4 | 81.8 [41.2,162.2]                               | .56           |
|             | Week 8 | 35.5 [18.3,69.1]                                | .002          |

Abbreviations: FMT, fecal microbiota transplantation

**eTable 16.** Baseline and Week 8 Data for Patients Randomized to Autologous Fecal Microbiota Transplantation

| Study Participant | Sex    | Disease extent | Visit 1 (week0)            |                  | Visit 2 (week8)            |                  | Week 8            |                    |                   |                      |                                                   |                    |
|-------------------|--------|----------------|----------------------------|------------------|----------------------------|------------------|-------------------|--------------------|-------------------|----------------------|---------------------------------------------------|--------------------|
|                   |        |                | Left endoscopic Mayo score | Total Mayo score | Left endoscopic Mayo score | Total Mayo score | Primary end point | Clinical remission | Clinical response | Endoscopic remission | Medications (Studyentry)                          | Colecomy by week 8 |
| 1                 | Male   | Pancolitis     | 2                          | 6                | 2                          | 7                | No                | No                 | No                | No                   | Prednisolone, Mesalazine                          | No                 |
| 4                 | Female | Pancolitis     | 2                          | 9                | 2                          | 9                | No                | No                 | No                | No                   | Prednisolone, 6-mercaptopurine                    | No                 |
| 6                 | Female | Pancolitis     | 3                          | 8                | 3                          | 8                | No                | No                 | No                | No                   | Mesalazine, Azathioprine                          | No                 |
| 7                 | Male   | Left sided     | 2                          | 7                | 2                          | 7                | No                | No                 | No                | No                   | Prednisolone, Mesalazine                          | No                 |
| 9                 | Female | Pancolitis     | 2                          | 9                | 2                          | 9                | No                | No                 | No                | No                   | Prednisolone, Mesalazine, methotrexate            | No                 |
| 10                | Female | Left sided     | 2                          | 5                | 2                          | 5                | No                | No                 | No                | No                   | Budesonide                                        | No                 |
| 11                | Male   | Pancolitis     | 2                          | 7                | 2                          | 7                | No                | No                 | No                | No                   | Sulfasalazine                                     | No                 |
| 14                | Female | Left sided     | 2                          | 7                | 1                          | 4                | No                | No                 | Yes               | No                   | Sulfasalazine, Mesalazine (topical), Azathioprine | No                 |
| 19                | Male   | Left sided     | 2                          | 4                | 1                          | 3                | No                | No                 | No                | No                   | Azathioprine                                      | No                 |
| 21                | Female | Left sided     | 2                          | 6                | 2                          | 9                | No                | No                 | No                | No                   | Prednisolone, Mesalazine, Azathioprine            | No                 |

**eTable 16.** Baseline and Week 8 Data for Patients Randomized to Autologous Fecal Microbiota Transplantation (Continued)

| Study Participant | Sex    | Disease extent | Visit 1 (week0)            |                  | Visit 2 (week8)            |                  | Week 8            |                    |                   |                      |                                                    |                    |
|-------------------|--------|----------------|----------------------------|------------------|----------------------------|------------------|-------------------|--------------------|-------------------|----------------------|----------------------------------------------------|--------------------|
|                   |        |                | Left endoscopic Mayo score | Total Mayo score | Left endoscopic Mayo score | Total Mayo score | Primary end point | Clinical remission | Clinical response | Endoscopic remission | Medications (Studyentry)                           | Colecomy by week 8 |
| 22                | Male   | Left sided     | 2                          | 7                | 2                          | 7                | No                | No                 | No                | No                   | Mesalazine, Mesalazine (topical)                   | No                 |
| 23                | Male   | Pancolitis     | 2                          | 8                | 2                          | 7                | No                | No                 | No                | No                   | Mesalazine                                         | No                 |
| 25                | Female | Left sided     | 2                          | 9                | 2                          | 7                | No                | No                 | No                | No                   | Mesalazine, Mesalazine (topical)                   | No                 |
| 27                | Male   | Pancolitis     | 2                          | 6                | 1                          | 7                | No                | No                 | No                | No                   | Mesalazine, Mesalazine (topical), 6-mercaptopurine | No                 |
| 28                | Male   | Left sided     | 3                          | 10               | 2                          | 9                | No                | No                 | No                | No                   | Azathioprine                                       | No                 |
| 30                | Male   | Left sided     | 2                          | 6                | 1                          | 2                | Yes               | Yes                | Yes               | No                   | Mesalazine, Mesalazine (topical)                   | No                 |
| 35                | Male   | Left sided     | 2                          | 6                | 2                          | 7                | No                | No                 | No                | No                   | Budesonide, Topicalsteroid                         | No                 |
| 37                | Male   | Pancolitis     | 2                          | 7                | 2                          | 4                | No                | Yes                | Yes               | No                   | Mesalazine                                         | No                 |
| 38                | Female | Pancolitis     | 2                          | 9                | n/a                        | n/a              | No                | No                 | No                | No                   | Azathioprine                                       | No                 |
| 39                | Female | Left sided     | 2                          | 8                | 1                          | 3                | No                | No                 | No                | No                   | Prednisolone, Mesalazine                           | No                 |
| 43                | Female | Pancolitis     | 3                          | 10               | 2                          | 4                | No                | Yes                | Yes               | No                   | Azathioprine, Infiximab                            | No                 |

**eTable 16.** Baseline and Week 8 Data for Patients Randomized to Autologous Fecal Microbiota Transplantation (Continued)

| Study Participant | Sex    | Disease extent | Visit 1 (week0)            |                  | Visit 2 (week8)            |                  | Week 8            |                    |                   |                      |                                                |                    |
|-------------------|--------|----------------|----------------------------|------------------|----------------------------|------------------|-------------------|--------------------|-------------------|----------------------|------------------------------------------------|--------------------|
|                   |        |                | Left endoscopic Mayo score | Total Mayo score | Left endoscopic Mayo score | Total Mayo score | Primary end point | Clinical remission | Clinical response | Endoscopic remission | Medications (Study entry)                      | Colecomy by week 8 |
| 44                | Male   | Left side      | 3                          | 10               | 3                          | 9                | No                | No                 | No                | No                   | Prednisolone, 6-mercaptopurine                 | No                 |
| 45                | Male   | Left side      | 3                          | 8                | 2                          | 4                | No                | No                 | Yes               | No                   | Mesalazine                                     | No                 |
| 46                | Male   | Pancolitis     | 2                          | 5                | 2                          | 3                | No                | Yes                | No                | No                   | Mesalazine                                     | No                 |
| 49                | Female | Left side      | 2                          | 5                | 0                          | 2                | Yes               | No                 | Yes               | No                   | Mesalazine, Azathioprine, Infiximab            | No                 |
| 51                | Male   | Pancolitis     | 2                          | 5                | 2                          | 4                | No                | Yes                | No                | No                   | Prednisolone                                   | No                 |
| 52                | Male   | Left side      | 3                          | 10               | 3                          | 10               | No                | No                 | No                | No                   | Mesalazine, Mesalazine (topical)               | No                 |
| 55                | Female | Left side      | 3                          | 10               | 3                          | 8                | No                | No                 | No                | No                   | Mesalazine, Mesalazine (topical), Azathioprine | No                 |
| 57                | Female | Left side      | 3                          | 10               | 3                          | 10               | No                | No                 | No                | No                   | Mesalazine                                     | No                 |
| 59                | Female | Pancolitis     | 2                          | 6                | 3                          | 7                | No                | No                 | No                | No                   | Prednisolone                                   | No                 |
| 61                | Male   | Left side      | 2                          | 7                | 1                          | 2                | Yes               | Yes                | Yes               | No                   | Nil                                            | No                 |
| 62                | Male   | Left side      | 2                          | 4                | 1                          | 3                | No                | No                 | No                | No                   | Mesalazine                                     | No                 |

**eTable 16.** Baseline and Week 8 Data for Patients Randomized to Autologous Fecal Microbiota Transplantation (Continued)

|                   |        |                | Visit 1 (week0)            |                  | Visit 2 (week8)            |                  | Week 8            |                    |                   |                      |                                                   |                    |
|-------------------|--------|----------------|----------------------------|------------------|----------------------------|------------------|-------------------|--------------------|-------------------|----------------------|---------------------------------------------------|--------------------|
| Study Participant | Sex    | Disease extent | Left endoscopic Mayo score | Total Mayo score | Left endoscopic Mayo score | Total Mayo score | Primary end point | Clinical remission | Clinical response | Endoscopic remission | Medications (Study entry)                         | Colecomy by week 8 |
| 64                | Male   | Left sided     | 2                          | 7                | 2                          | 8                | No                | No                 | No                | No                   | Mesalazine, Budesonide, Azathioprine, Vedolizumab | No                 |
| 70                | Male   | Left sided     | 2                          | 8                | 1                          | 3                | No                | No                 | Yes               | No                   | Prednisolone<br>Mesalazine                        | No                 |
| 72                | Female | Left sided     | 3                          | 10               | 3                          | 10               | No                | No                 | No                | No                   | Mesalazine, Azathioprine, Infliximab              | No                 |

**eTable 17.** Baseline and Week 8 Data for Patients Randomized to Donor Fecal Microbiota Transplantation

|                   |        |                | Visit 1 (week0)            |                  | Visit 2 (week8)            |                  | Week 8            |                    |                   |                      |                                                                 |                    |
|-------------------|--------|----------------|----------------------------|------------------|----------------------------|------------------|-------------------|--------------------|-------------------|----------------------|-----------------------------------------------------------------|--------------------|
| Study Participant | Sex    | Disease extent | Left endoscopic Mayo score | Total Mayo score | Left endoscopic Mayo score | Total Mayo score | Primary end point | Clinical remission | Clinical response | Endoscopic remission | Medications (Studyentry)                                        | Colecomy by week 8 |
| 2                 | Male   | Left sided     | 2                          | 7                | 1                          | 4                | No                | Yes                | Yes               | No                   | Sulfasalazine, Azathioprine                                     | No                 |
| 3                 | Male   | Pancolitis     | 2                          | 7                | 1                          | 5                | No                | No                 | No                | No                   | Mesalazine, Mesalazine (topical), Methotrexate                  | No                 |
| 5                 | Female | Left sided     | 3                          | 8                | 1                          | 4                | No                | Yes                | Yes               | No                   | Mesalazine, Azathioprine                                        | No                 |
| 8                 | Male   | Left sided     | 2                          | 7                | 1                          | 3                | No                | Yes                | Yes               | No                   | Sulfasalazine                                                   | No                 |
| 12                | Female | Pancolitis     | 3                          | 10               | n/a                        | n/a              | No                | No                 | No                | No                   | Prednisolone, Sulfasalazine, Mesalazine (topical), Azathioprine | Yes                |
| 13                | Male   | Pancolitis     | 2                          | 8                | 1                          | 3                | No                | Yes                | Yes               | No                   | Mesalazine, Azathioprine                                        | No                 |
| 15                | Female | Left sided     | 2                          | 7                | 1                          | 2                | Yes               | No                 | Yes               | No                   | Mesalazine, Mesalazine (topical)                                | No                 |
| 16                | Male   | Left sided     | 2                          | 7                | 2                          | 5                | No                | Yes                | No                | No                   | Mesalazine, Mesalazine (topical)                                | No                 |

**eTable 17.** Baseline and Week 8 Data for Patients Randomized to Donor Fecal Microbiota Transplantation (Continued)

| Study Participant | Sex    | Disease extent | Visit 1 (week0)            |                  | Visit 2 (week8)            |                  | Week 8            |                    |                   |                      |                                    |                    |
|-------------------|--------|----------------|----------------------------|------------------|----------------------------|------------------|-------------------|--------------------|-------------------|----------------------|------------------------------------|--------------------|
|                   |        |                | Left endoscopic Mayo score | Total Mayo score | Left endoscopic Mayo score | Total Mayo score | Primary end point | Clinical remission | Clinical response | Endoscopic remission | Medications (Studyentry)           | Colecomy by week 8 |
| 17                | Female | Left sided     | 2                          | 8                | n/a                        | n/a              | No                | No                 | No                | No                   | Mesalazine, Mesalazine (topical)   | No                 |
| 18                | Male   | Pancolitis     | 2                          | 7                | 0                          | 0                | Yes               | Yes                | Yes               | Yes                  | Mesalazine                         | No                 |
| 20                | Female | Left sided     | 2                          | 5                | 1                          | 4                | No                | No                 | No                | No                   | Mesalazine                         | No                 |
| 24                | Male   | Pancolitis     | 2                          | 8                | 0                          | 0                | Yes               | Yes                | Yes               | Yes                  | Mesalazine                         | No                 |
| 26                | Female | Left sided     | 3                          | 9                | 1                          | 2                | Yes               | Yes                | Yes               | No                   | Prednisolone, Sulfasalazine        | No                 |
| 29                | Male   | Pancolitis     | 2                          | 6                | 2                          | 6                | No                | No                 | No                | No                   | Nil                                | No                 |
| 31                | Female | Left sided     | 3                          | 7                | 2                          | 5                | No                | Yes                | No                | No                   | Mesalazine (topical), Methotrexate | No                 |
| 32                | Male   | Left sided     | 2                          | 6                | 2                          | 9                | No                | No                 | No                | No                   | Sulfasalazine                      | No                 |
| 33                | Male   | Left sided     | 2                          | 7                | 1                          | 3                | No                | No                 | Yes               | No                   | Mesalazine, Mesalazine (topical)   | No                 |
| 34                | Female | Pancolitis     | 2                          | 7                | 2                          | 6                | No                | No                 | No                | No                   | Mesalazine                         | No                 |
| 36                | Male   | Left sided     | 2                          | 8                | 2                          | 7                | No                | No                 | No                | No                   | Mesalazine. 6-mercaptopurine       | No                 |

**eTable 17.** Baseline and Week 8 Data for Patients Randomized to Donor Fecal Microbiota Transplantation (Continued)

| Study Participant | Sex    | Disease extent | Visit 1 (week0)            |                  | Visit 2 (week8)            |                  | Week 8            |                    |                   |                      |                                                   |                    |
|-------------------|--------|----------------|----------------------------|------------------|----------------------------|------------------|-------------------|--------------------|-------------------|----------------------|---------------------------------------------------|--------------------|
|                   |        |                | Left endoscopic Mayo score | Total Mayo score | Left endoscopic Mayo score | Total Mayo score | Primary end point | Clinical remission | Clinical response | Endoscopic remission | Medications (Study entry)                         | Colecomy by week 8 |
| 40                | Female | Left side      | 2                          | 8                | 0                          | 0                | No                | No                 | No                | No                   | Prednisolone, Sulfasalazine, Mesalazine (topical) | No                 |
| 41                | Male   | Pancolitis     | 2                          | 4                | 1                          | 2                | Yes               | No                 | No                | No                   | Mesalazine                                        | No                 |
| 42                | Female | Left side      | 3                          | 9                | 1                          | 3                | No                | Yes                | Yes               | No                   | Sulfasalazine, Mesalazine (topical)               | No                 |
| 47                | Male   | Left sided     | 2                          | 4                | 0                          | 0                | Yes               | Yes                | Yes               | Yes                  | Sulfasalazine                                     | No                 |
| 48                | Male   | Pancolitis     | 3                          | 9                | 1                          | 2                | Yes               | No                 | Yes               | No                   | Prednisolone, Mesalazine, Azathioprine            | No                 |
| 50                | Male   | Left sided     | 1                          | 4                | 0                          | 0                | Yes               | Yes                | Yes               | Yes                  | Mesalazine, Azathioprine                          | No                 |
| 53                | Female | Left sided     | 2                          | 7                | 1                          | 2                | Yes               | Yes                | Yes               | No                   | Mesalazine, Mesalazine (topical), Vedolizumab     | No                 |
| 54                | Female | Left sided     | 2                          | 6                | 1                          | 4                | No                | No                 | No                | No                   | Mesalazine, Azathioprine                          | No                 |
| 56                | Male   | Pancolitis     | 2                          | 7                | 2                          | 6                | No                | No                 | No                | No                   | Mesalazine, Azathioprine                          | No                 |
| 58                | Female | Left sided     | 3                          | 9                | 2                          | 6                | No                | No                 | Yes               | No                   | Nil                                               | No                 |



**eTable 17.** Baseline and Week 8 Data for Patients Randomized to Donor Fecal Microbiota Transplantation (Continued)

| Study Participant | Sex    | Disease extent | Visit 1 (week0)            |                  | Visit 2 (week8)            |                  | Week 8            |                    |                   |                      |                                            |                    |
|-------------------|--------|----------------|----------------------------|------------------|----------------------------|------------------|-------------------|--------------------|-------------------|----------------------|--------------------------------------------|--------------------|
|                   |        |                | Left endoscopic Mayo score | Total Mayo score | Left endoscopic Mayo score | Total Mayo score | Primary end point | Clinical remission | Clinical response | Endoscopic remission | Medications (Study entry)                  | Colecomy by week 8 |
| 60                | Female | Pancolitis     | 3                          | 10               | 2                          | 5                | No                | No                 | Yes               | No                   | Prednisolone, Mesalazine, Azathioprine     | No                 |
| 63                | Female | Left sided     | 2                          | 6                | 2                          | 7                | No                | No                 | No                | No                   | Mesalazine, Mesalazine (topical)           | No                 |
| 65                | Male   | Pancolitis     | 3                          | 10               | 2                          | 6                | No                | Yes                | Yes               | No                   | Mesalazine                                 | No                 |
| 66                | Male   | Left side      | 2                          | 7                | 1                          | 1                | Yes               | Yes                | Yes               | No                   | Prednisolone, Mesalazine, 6-mercaptopurine | No                 |
| 67                | Male   | Pancolitis     | 2                          | 7                | 1                          | 2                | Yes               | Yes                | Yes               | No                   | Mesalazine, Mesalazine (topical)           | No                 |
| 68                | Female | Left side      | 3                          | 8                | 2                          | 4                | No                | Yes                | Yes               | No                   | Infliximab                                 | No                 |
| 69                | Female | Left side      | 3                          | 10               | n/a                        | n/a              | No                | No                 | No                | No                   | Prednisolone                               | No                 |
| 71                | Female | Pancolitis     | 2                          | 4                | 1                          | 1                | Yes               | Yes                | Yes               | No                   | Mesalazine, Azathioprine, Infliximab       | No                 |
| 73                | Male   | Pancolitis     | 2                          | 7                | 2                          | 5                | No                | No                 | No                | No                   | Mesalazine                                 | No                 |

**eTable 18.** 12-Month Data for Patients Randomized to Autologous Fecal Microbiota Transplantation

| Study Participant | Sex    | Left endoscopic Mayo | Total Mayo | Clinical and endoscopic remission | Clinical remission | Endoscopic remission | Medications (12 months)                | Months taking corticosteroid | Symptoms free for 12 months | Colectomy by 12 months |
|-------------------|--------|----------------------|------------|-----------------------------------|--------------------|----------------------|----------------------------------------|------------------------------|-----------------------------|------------------------|
| 1                 | Male   | n/a                  | n/a        | n/a                               | n/a                | n/a                  | Unknown                                | Unknown                      | No                          | No                     |
| 4                 | Female | n/a                  | n/a        | n/a                               | n/a                | n/a                  | Nil                                    | 0                            | No                          | Yes                    |
| 6                 | Female | 0                    | 1          | Yes                               | Yes                | Yes                  | Azathioprine                           | 0                            | Yes                         | No                     |
| 7                 | Male   | 2                    | 9          | No                                | No                 | No                   | Prednisolone, Mesalazine               | 11                           | No                          | No                     |
| 9                 | Female | n/a                  | n/a        | n/a                               | No                 | n/a                  | Prednisolone, Mesalazine               | 12                           | No                          | No                     |
| 10                | Female | 1                    | 1          | Yes                               | Yes                | No                   | Mesalazine                             | 0                            | Yes                         | No                     |
| 11                | Male   | n/a                  | n/a        | n/a                               | n/a                | n/a                  | Infliximab, Methotrexate               | 2                            | No                          | Yes                    |
| 14                | Female | n/a                  | n/a        | n/a                               | n/a                | n/a                  | Unknown                                | Unknown                      | Yes                         | No                     |
| 19                | Male   | 1                    | 2          | Yes                               | Yes                | No                   | Azathioprine                           | 3                            | No                          | No                     |
| 21                | Female | 3                    | 7          | No                                | No                 | No                   | Prednisolone, Mesalazine, Azathioprine | 6                            | No                          | No                     |
| 22                | Male   | n/a                  | n/a        | n/a                               | No                 | n/a                  | Mesalazine, Mesalazine (topical)       | 0                            | Yes                         | No                     |
| 23                | Male   | n/a                  | n/a        | n/a                               | n/a                | n/a                  | Unknown                                | Unknown                      | No                          | Yes                    |
| 25                | Female | 1                    | 2          | Yes                               | Yes                | No                   | Mesalazine                             | 0                            | No                          | No                     |
| 27                | Male   | 1                    | 2          | Yes                               | Yes                | No                   | Mesalazine, 6-mercaptopurine           | 3                            | No                          | No                     |
| 28                | Male   | n/a                  | n/a        | n/a                               | n/a                | n/a                  | Nil                                    | 0                            | No                          | No                     |
| 30                | Male   | 2                    | 5          | No                                | Yes                | No                   | Mesalazine, Mesalazine (topical)       | 0                            | No                          | No                     |
| 35                | Male   | 1                    | 2          | Yes                               | Yes                | No                   | Budesonide                             | 0                            | Yes                         | No                     |

**eTable 18.** 12-Month Data for Patients Randomized to Autologous Fecal Microbiota Transplantation (Continued)

| Study Participant | Sex    | Left endoscopic Mayo | Total Mayo | Clinical and endoscopic remission | Clinical remission | Endoscopic remission | Medications (12 months)                            | Months taking corticosteroid | Symptoms free for 12 months | Colectomy by 12 months |
|-------------------|--------|----------------------|------------|-----------------------------------|--------------------|----------------------|----------------------------------------------------|------------------------------|-----------------------------|------------------------|
| 37                | Male   | n/a                  | n/a        | n/a                               | n/a                | n/a                  | Unknown                                            | Unknown                      | No                          | No                     |
| 38                | Female | n/a                  | n/a        | n/a                               | n/a                | n/a                  | Unknown                                            | Unknown                      | No                          | No                     |
| 39                | Female | 1                    | 2          | Yes                               | Yes                | No                   | Azathioprine                                       | 3                            | No                          | No                     |
| 43                | Female | 2                    | 7          | No                                | No                 | No                   | 100mg Azathioprine                                 | 0                            | No                          | No                     |
| 44                | Male   | n/a                  | n/a        | n/a                               | n/a                | n/a                  | Nil                                                | 0                            | No                          | Yes                    |
| 45                | Male   | 0                    | 0          | Yes                               | Yes                | Yes                  | Azathioprine                                       | 0                            | Yes                         | No                     |
| 46                | Male   | 2                    | 7          | No                                | No                 | No                   | Mesalazine, Vedolizumab                            | 3                            | No                          | No                     |
| 49                | Female | 0                    | 2          | Yes                               | n/a                | Yes                  | Unknown                                            | Unknown                      | No                          | No                     |
| 51                | Male   | 2                    | 7          | No                                | No                 | No                   | Infliximab                                         | 0                            | No                          | No                     |
| 52                | Male   | n/a                  | n/a        | n/a                               | No                 | n/a                  | mesalazine (topical)                               | 0                            | No                          | No                     |
| 55                | Female | n/a                  | n/a        | n/a                               | No                 | n/a                  | Mesalazine, Infliximab                             | 0                            | No                          | No                     |
| 57                | Female | 3                    | 9          | No                                | No                 | No                   | Mesalazine                                         | 2                            | No                          | No                     |
| 59                | Female | n/a                  | n/a        | n/a                               | n/a                | n/a                  | Unknown                                            | Unknown                      | No                          | Yes                    |
| 61                | Male   | n/a                  | n/a        | n/a                               | n/a                | n/a                  | Unknown                                            | Unknown                      | No                          | No                     |
| 62                | 62     | n/a                  | n/a        | n/a                               | No                 | n/a                  | Prednisolone, Mesalazine, Azathioprine, Infliximab | 3                            | No                          | No                     |
| 64                | 64     | n/a                  | n/a        | n/a                               | n/a                | n/a                  | Nil                                                | 0                            | No                          | Yes                    |
| 70                | 70     | 0                    | 0          | Yes                               | n/a                | Yes                  | Nil                                                | 0                            | Yes                         | No                     |
| 72                | 72     | n/a                  | n/a        | n/a                               | n/a                | n/a                  | Mesalazine, Azathioprine, Infliximab               | 0                            | Yes                         | No                     |

**eTable 19.** 12-Month Data for Patients Randomized to Donor Fecal Microbiota Transplantation

| Study Participant | Sex    | Left endoscopic Mayo | Total Mayo | Clinical and endoscopic remission | Clinical remission | Endoscopic remission | Medications (12 months)                           | Months taking corticosteroid | Symptoms free for 12 months | Colectomy by 12 months |
|-------------------|--------|----------------------|------------|-----------------------------------|--------------------|----------------------|---------------------------------------------------|------------------------------|-----------------------------|------------------------|
| 2                 | Male   | 0                    | 0          | Yes                               | Yes                | Yes                  | Azathioprine                                      | 0                            | Yes                         | No                     |
| 3                 | Male   | n/a                  | n/a        | n/a                               | n/a                | n/a                  | Mesalazine, Infliximab                            | 3                            | No                          | No                     |
| 5                 | Female | 2                    | 7          | No                                | No                 | No                   | Mesalazine, Mesalazine (topical), Azathioprine    | 2                            | No                          | No                     |
| 8                 | Male   | 2                    | 4          | No                                | No                 | No                   | Sulfasalazine, Infliximab                         | 4                            | No                          | No                     |
| 12                | Female | n/a                  | n/a        | n/a                               | n/a                | n/a                  | Prednisolone, Sulfasalazine, Mesalazine (topical) | 10                           | No                          | Yes                    |
| 13                | Male   | n/a                  | n/a        | n/a                               | Yes                | n/a                  | Mesalazine, Azathioprine                          | 0                            | No                          | No                     |
| 15                | Female | n/a                  | n/a        | n/a                               | No                 | n/a                  | Mesalazine                                        | 0                            | No                          | No                     |
| 16                | Male   | 3                    | 10         | No                                | No                 | No                   | Unknown                                           | Unknown                      | No                          | No                     |
| 17                | Female | n/a                  | n/a        | n/a                               | n/a                | n/a                  | Mesalazine (topical)                              | 8                            | No                          | Yes                    |
| 18                | Male   | 1                    | 2          | Yes                               | Yes                | No                   | Mesalazine                                        | 0                            | Yes                         | No                     |
| 20                | Female | 0                    | 0          | Yes                               | Yes                | Yes                  | Mesalazine (topical)                              | 0                            | No                          | No                     |
| 24                | Male   | 2                    | 5          | No                                | No                 | No                   | Mesalazine                                        | 0                            | Yes                         | No                     |
| 26                | Female | 1                    | 3          | No                                | No                 | No                   | Prednisolone, Mesalazine                          | 10                           | No                          | No                     |
| 29                | Male   | n/a                  | n/a        | n/a                               | n/a                | n/a                  | Vedolizumab                                       | 4                            | No                          | No                     |

**eTable 19.** 12-Month Data for Patients Randomized to Donor Fecal Microbiota Transplantation (Continued)

| Study Participant | Sex    | Left endoscopic Mayo | Total Mayo | Clinical and endoscopic remission | Clinical remission | Endoscopic remission | Medications (12 months)                                 | Months taking corticosteroid | Symptoms free for 12 months | Colectomy by 12 months |
|-------------------|--------|----------------------|------------|-----------------------------------|--------------------|----------------------|---------------------------------------------------------|------------------------------|-----------------------------|------------------------|
| 31                | Female | 2                    | 4          | No                                | Yes                | No                   | Mesalazine (topical), Methotrexate                      | 0                            | Yes                         | No                     |
| 32                | Male   | 1                    | 6          | No                                | No                 | No                   | Sulfasalazine, Vedolizumab                              | Unknown                      | No                          | No                     |
| 33                | Male   | n/a                  | n/a        | n/a                               | n/a                | n/a                  | Mesalazine, Mesalazine (topical)                        | 1                            | No                          | No                     |
| 34                | Female | 2                    | 3          | No                                | Yes                | No                   | Mesalazine                                              | Unknown                      | No                          | No                     |
| 36                | Male   | n/a                  | n/a        | n/a                               | No                 | n/a                  | Prednisolone, Mesalazine. 6-mercaptopurine, Vedolizumab | 12                           | No                          | No                     |
| 40                | Female | n/a                  | n/a        | n/a                               | Yes                | n/a                  | Sulfasalazine                                           | 2                            | No                          | No                     |
| 41                | Male   | 1                    | 2          | Yes                               | Yes                | No                   | Mesalazine                                              | 0                            | Yes                         | No                     |
| 42                | Female | 3                    | 7          | No                                | Yes                | No                   | Sulfasalazine                                           | 0                            | No                          | No                     |
| 47                | Male   | 1                    | 2          | Yes                               | Yes                | No                   | Sulfasalazine                                           | 0                            | No                          | No                     |
| 48                | Male   | 1                    | 1          | Yes                               | Yes                | No                   | Azathioprine                                            | 6                            | No                          | No                     |
| 50                | Male   | n/a                  | n/a        | n/a                               | Yes                | n/a                  | Unknown                                                 | Unknown                      | No                          | No                     |
| 53                | Female | n/a                  | n/a        | n/a                               | n/a                | n/a                  | Nil                                                     | 0                            | No                          | Yes                    |
| 54                | Female | 0                    | 0          | Yes                               | Yes                | Yes                  | Mesalazine, Azathioprine                                | 2                            | No                          | No                     |
| 56                | Male   | 1                    | 3          | No                                | No                 | No                   | Unknown                                                 | Unknown                      | No                          | No                     |
| 58                | Female | 1                    | 4          | No                                | Yes                | No                   | Unknown                                                 | Unknown                      | No                          | No                     |
| 60                | Female | 0                    | 0          | Yes                               | No                 | Yes                  | Mesalazine, Azathioprine                                | 2                            | No                          | No                     |

**eTable 19.** 12-Month Data for Patients Randomized to Donor Fecal Microbiota Transplantation (Continued)

| Study Participant | Sex    | Left endoscopic Mayo | Total Mayo score | Clinical and endoscopic remission | Clinical remission | Endoscopic remission | Medications (12 months)          | Months taking | Symptoms free for 12 months | Colectomy by 12 months |
|-------------------|--------|----------------------|------------------|-----------------------------------|--------------------|----------------------|----------------------------------|---------------|-----------------------------|------------------------|
| 63                | Female | 1                    | 1                | Yes                               | No                 | No                   | Mesalazine, Mesalazine (topical) | Unknown       | No                          | No                     |
| 65                | Male   | 2                    | 6                | No                                | Yes                | No                   | Mesalazine                       | 0             | No                          | No                     |
| 66                | Male   | 1                    | 3                | No                                | No                 | No                   | Mesalazine, 6-mercaptopurine     | 0             | No                          | No                     |
| 67                | Male   | 2                    | 7                | No                                | No                 | No                   | Mesalazine, Adalimumab           | 2             | No                          | No                     |
| 68                | Female | 1                    | 2                | Yes                               | Yes                | No                   | Infliximab                       | 0             | No                          | No                     |
| 69                | Female | n/a                  | n/a              | n/a                               | Yes                | n/a                  | Vedolizumab                      | 4             | No                          | No                     |
| 71                | Female | 1                    | 2                | Yes                               | Yes                | No                   | Infliximab                       | 0             | Yes                         | No                     |
| 73                | Male   | 2                    | 6                | No                                | No                 | No                   | Mesalazine                       | 1             | Yes                         | No                     |

**eTable 20.** Change Due to Treatment in Butyrate Producing Species and Genera

| <b>Species</b>                      | <b>Family</b>   | <b>Phylum</b> | <b>Treatment difference<br/>log change abundance<br/>Week 4 [95%CI]</b> | <b>Week 4<br/>P Value</b> | <b>Treatment difference<br/>log change abundance<br/>Week 8 [95%CI]</b> | <b>Week 8<br/>P Value</b> |
|-------------------------------------|-----------------|---------------|-------------------------------------------------------------------------|---------------------------|-------------------------------------------------------------------------|---------------------------|
| <i>Anaerostipes caccae</i>          | Lachnospiraceae | Firmicutes    | -2.78 [-4.36 to -1.21]                                                  | .0005                     | -2.53 [-4.23 to -0.84]                                                  | .003                      |
| <i>Butyricoccus pullicaecorum</i>   | Ruminococcaceae | Firmicutes    | 0.95 [-0.13 to 2.03]                                                    | .09                       | -0.45 [-1.55 to 0.65]                                                   | .42                       |
| <i>Roseburia inulinivorans</i>      | Lachnospiraceae | Firmicutes    | 0.54 [-0.41 to 1.48]                                                    | .27                       | -0.36 [-1.3 to 0.59]                                                    | .46                       |
| <i>Anaerostipes butyraticus</i>     | Lachnospiraceae | Firmicutes    | -1.26 [-4 to 1.47]                                                      | .37                       | -5.11 [-8.12 to -2.1]                                                   | <.001                     |
| <i>Roseburia intestinalis</i>       | Lachnospiraceae | Firmicutes    | -0.3 [-1.02 to 0.41]                                                    | .4                        | -0.27 [-0.98 to 0.44]                                                   | .46                       |
| <i>Faecalibacterium prausnitzii</i> | Ruminococcaceae | Firmicutes    | 0.16 [-0.22 to 0.54]                                                    | .41                       | -0.06 [-0.45 to 0.32]                                                   | .74                       |
| Anaerostipes sp.                    | Lachnospiraceae | Firmicutes    | -0.12 [-0.59 to 0.35]                                                   | .62                       | -0.13 [-0.6 to 0.35]                                                    | .60                       |

**eFigure.** Butyrate Producing Bacteria Prevalence in Donors (Individual and Pooled) and Patients Prior to, Then 4 and 8 Weeks After Donor Fecal Microbiota Transplantation

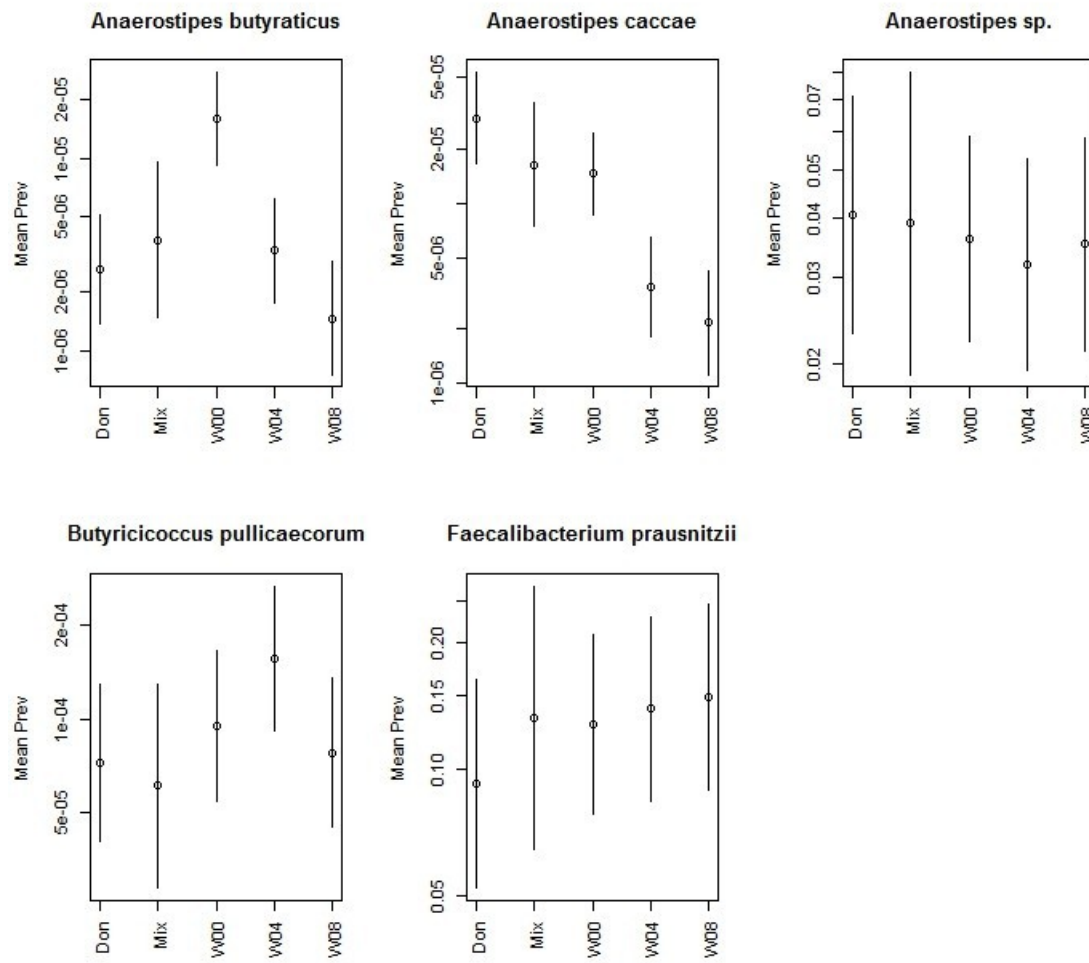



## **eAppendix 1. Bacterial Analysis Methods**

There were 228 fecal samples available from 72 patients enrolled in the study and 72 fecal samples available from donors (53 individual donor and 19 pooled batches). Stool from patients and individual donors was frozen without additive at  $-80^{\circ}\text{C}$ . Stool swabs were stored for up to 8 weeks at  $-20^{\circ}\text{C}$  prior to transfer to  $-80^{\circ}\text{C}$ . Stool from the donor batches was frozen at  $-80^{\circ}\text{C}$  with 65% saline and 10% glycerol.

We extracted bacterial DNA from the samples using the MoBio PowerMag Microbial DNA Isolation kit (MoBio Laboratories, Carlsbad, CA, USA) following the manufacturer's protocol. All stool samples were extracted and processed in duplicate. Amplicon library preparation was performed using a modified dual-index PCR approach.<sup>1</sup> The first-step primers (515F, 806R), which were modified by the inclusion of a phaser to increase heterogeneity in the sequencing run,<sup>2</sup> amplified the V4-V5 hypervariable region of the 16S rRNA gene and the second set (i5, i7) added the indexed barcodes to enable multiplexing of our large number of samples.<sup>1</sup> The library was pooled at equi-molar concentrations and run on an Illumina HiSeq2500 Rapid instrument using 2 x 250 bp paired end chemistry (Ramaciotti Centre for Genomics, University of New South Wales). The median number of reads per sample was 143k (thousand) (IQR, 111k-196k). Samples with total read count  $<10\text{k}$  were excluded.

## **eAppendix 2. Bioinformatics**

Raw sequencing data was processed using a combination of both in-house and open source software. The bioinformatic pipeline utilised USEARCH algorithms<sup>3</sup> which included merging, quality-filtering, partitioning/de-replicating and clustering into operational taxonomic units (OTUs) at 97% similarity. Representative sequences from each OTU were classified in two ways: via the RDP Naïve Bayesian Classifier and by finding the closest match in a set of curated reference sequences (RDP 16S Training Set + RefSeq 16S).<sup>4</sup> The use of two independent classification techniques improves confidence in the taxonomic assignments.

## **eAppendix 3. Flow Cytometry**

**Lamina Propria Mononuclear Cell isolation:** Colonic mucosal biopsies were incubated twice in HEPES buffered HBSS supplemented with 1mM EDTA and 1mM DTT (Sigma) for 10 minutes at 37°C under slow rotation, with the suspension strained (100µM) between incubations. Residual tissue was incubated in HEPES buffered Ca<sup>2+</sup>/Mg<sup>2+</sup> free HBSS for 10 minutes at 37°C under slow rotation and strained (100µM). Residual tissue was minced and incubated in complete media (RPMI 1640 [Gibco, Germany] supplemented with fetal calf serum, glutamax and penicillin / streptomycin, Collagenase D [1mg/ml, Roche], DNase1 [0.5mg/ml, Sigma] and Dispase [3mg/ml, Roche]). Collagenase D (Roche, NSW, Australia), 0.5mg/ml DNase1 (Sigma) and 3mg/mL Dispase (Roche) for 20 minutes twice with supernatant removal from centrifugation (300g, 5minutes) after each incubation. Residual suspensions were sequentially strained (100µM followed by 40µM), with the supernatant centrifuged (300g, 5min), resuspended, stained with trypan blue to determine viability and cell number as previously described.<sup>5-7</sup>

**Cell staining:**  $0.5 \times 10^6$  F<sub>c</sub> blocked cells (BD Biosciences, NSW, Australia) were stained for viability (FVD eFlour450, eBioscience) and the following anti-human monoclonal antibody panels (BD Bioscience unless otherwise stated): a) HLADR-APC, CD11C-FITC, Lin (CD3, CD14, CD16, CD19, CD34, CD56 all APC-Cy7, CD33-PerCP Cy5.5), b) CD3-APC, CD45RO-PerCPCy5.5, CD19-APCCy7, CD20-APCCy7, CD16-PE, CD56-PE, V $\alpha$ 24j $\alpha$ -FITC (eBioscience), c) CD3-APC, CD8-FITC, CD45RO-PerCP Cy5.5,  $\gamma\delta$ T-PE (eBioscience). For T<sub>REG</sub>, cells were stained with CD4-APC Cy7, CD8-PE, CD45RO PerCP Cy5.5, CD25 PE Cy7,  $\beta$ 7-FITC, followed by fixation and permeabilization (Transcription buffer staining set, eBioscience) and staining with FOXP3-APC (eBioscience). The following gating strategy was used to identify cell populations: Macrophages (lin-ve/HLADR/CD33+ve), dendritic cells (lin -ve HLADR+/CD33+/CD11c+), T<sub>HELPER</sub> (CD4+ CD8-), T<sub>CYTOTOXIC</sub> (CD8+ CD4-), T<sub>REGULATORY</sub> (CD4+/CD8-/CD25+/FOXP3+), B (CD3-, CD19+CD20+), Natural Killer (CD3-/CD16+/CD56+/CD45RO-), Natural Killer T (CD3+/NKT+),  $\gamma\delta$  T (CD3+/ $\gamma\delta$ T+) in LPMC, and gut homing T<sub>HELPER</sub> (CD4+/CD8-/CD45RO+/ $\beta$ 7+) and gut homing T<sub>REGULATORY</sub> (CD4+/CD8-/CD45RO+/ $\beta$ 7+/CD25+/FOXP3+) were determined in PBMC. 20,000 events / tube were analysed on a FACSCanto II (BD Biosciences) and proportions of live singlets were determined using FlowJo (Tree Star, OR, USA) as previously described.<sup>5-7</sup>

## **eAppendix 4. Statistical Analysis**

### *Microbiome Diversity*

Microbiome diversity was defined as the fraction of unique species present at an assessment out of all species present at any analysis in any sample. Logistic mixed effects regressions were used to compare between treatment groups with donor stool and stool mix samples. Outcome was the presence of a species in a particular sample. Fixed effects included sample origin (donor vs mix vs treated patient vs untreated patient) and total sample count (log-transformed). Three non-nested random effects were included; patient identifier, donor batch, and the microbiome species identifier. To assess the effect of treatment a separate model was contrasted with only post baseline samples included as outcome. This model was identical to the previous except that the fixed effects were baseline prevalence (logit transformed), treatment allocation, assessment time (week 4 vs week 8), the pairwise treatment-assessment time interaction, and total sample count (log-transformed).

Associations between both baseline diversity and change in diversity, and change in Mayo score were assessed as before (re associations with baseline factors). A two-stage approach was taken, first the mean diversity was estimated using the logistic mixed effects models previously described in this section. These diversity estimates were then included in the models of total Mayo score as fixed effects.

### *Microbiome Abundance*

Associations between changes in biome species abundance with total Mayo score were modelled in a similar manner. For each sample the mean proportion of total counts was calculated, and subsequently for individuals with samples at both week 4 and 8 averaged to estimate baseline and post randomization prevalence estimates. The change in prevalence was then included in linear mixed effects models of total Mayo

score. A false discovery rate (FDR) analysis was performed to provide evidence of associations beyond what would be expected due to multiple testing, with the FDR being compared with the same analysis repeated, but with outcome (total Mayo score) permuted between individuals.

The change in abundance by treatment group and assessment time were assessed using a negative binomial mixed effects regression for each microbiome species. Fixed effects included treatment allocation, assessment time (baseline, week 4, week 8, and 12-months) and their pairwise interaction. Nested random intercepts per patient and assessment were included in the model, with total sample count (log transformed) included as an offset. Due to the large variation in abundance across species, from highly abundant to mostly absent, a zero-inflation term was included in the model and Akaike's information criteria was used to determine whether this improved model fit per species.

#### *Fecal short chain fatty acid & calprotectin*

The estimate of treatment effect on calprotectin and short chain fatty acids (SCFAs), which had an extra assessment at week 4, was similarly modelled with however both week 4 and week 8 assessments as outcome. Baseline values, treatment group, assessment time (week 4 v week 8), and the pairwise interaction between time and treatment were included as fixed effects. In addition to the batch and site random intercepts, within-individual random intercepts were included nested within site. After inspection of the distribution of the residuals, these analyses were performed on log transformed calprotectin, SFCA measures and immunological markers, with results converted back to the original scale.

Associations between estimated change in SCFA and week 8 Mayo score were assessed by including the estimated change in SCFA as a fixed effect in the mixed effects regression models with week 8 Mayo score as outcome. Individual level SCFA change scores were estimated using linear mixed effects regressions adjusting for baseline levels and treatment, with random intercepts per batch, individual and site, with individual level effects nested within site.

**eAppendix 5.** Patient Perception of Faecal Transplantation for Ulcerative  
Colitis Questionnaire

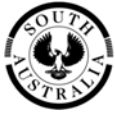

Name:

DOB:

Date:

Patient Perception of Faecal Transplantation for Ulcerative Colitis  
Questionnaire

**Prior to faecal transplantation-** Please circle the most appropriate answer

1. Do you believe that faecal transplantation is likely to help with your symptoms?

Impossible   Not likely   Unsure   Quite likely   Very likely

2. Have you considered faecal transplantation for ulcerative colitis previously?

Yes I have considered it      I have heard of it, but not considered it

I have never heard of it before

3.1 Do you consider that faecal transplantation is likely to be safe?

Impossible   Not likely   Unsure   Quite likely   Very likely

Please explain why

3.2 Do you consider that 5-ASA medication (e.g. sulphasalazine, mesalazine) is likely to be safe?

Impossible   Not likely   Unsure   Quite likely   Very likely

3.3 Do you consider that steroid medication (e.g. prednisolone) is likely to be safe?

Impossible   Not likely   Unsure   Quite likely   Very likely

3.4 Do you consider that thiopurine medication (e.g. azathioprine/ 6-MP) is likely to be safe?

Impossible   Not likely   Unsure   Quite likely   Very likely

3.5 Do you consider that methotrexate medication is likely to be safe?

Impossible   Not likely   Unsure   Quite likely   Very likely

3.6 Do you consider that anti-TNF medication (e.g. infliximab (Remicade)/ adalimumab (Humira)) is likely to be safe?



Impossible    Not likely    Unsure    Quite likely    Very likely

3.7 Do you consider that surgical removal of the colon is likely to be safe?

Impossible    Not likely    Unsure    Quite likely    Very likely

4. Do you believe faecal transplantation as carried out in this study would be seen as acceptable by

1) The general Australian population? Yes No Unsure

2) Patients with ulcerative colitis?      Yes No Unsure

5. Do you have any cultural or religious concerns about receiving faecal material from another person?

Yes      No      Unsure

If yes, what are your concerns?

6. How would you compare faecal transplantation to traditional medical treatments of ulcerative colitis?

a) How do you compare the acceptability of these treatments?

7. How would you compare faecal transplantation to other treatments such as probiotics?

a) How do you compare the acceptability of these treatments

8. Do you have any concerns about discussing faecal transplant with friends or family?

If so why?

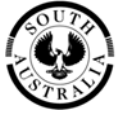

Name:

DOB:

Date:

**Patient perception of faecal transplantation for ulcerative colitis questionnaire**

**12 months post faecal transplantation** – Please circle the most appropriate answer

1. Do you believe that faecal transplantation helped with your symptoms at least temporarily?

Not at all, Yes a little, Yes a lot, Unsure (Circle)

If you had symptom improvement how long did this last?

2. Has your medication requirement decreased or increased in the 12 months since faecal transplant? (Circle) Decreased Increased The same

What are you now taking?

For how many months were you taking steroid (eg prednisolone) in the 12 months after faecal transplant?

Has the amount of steroid medication changed in the 12 months post faecal transplant compared to the 12 months prior? (circle)

Increased Decreased Stayed the same

3. How many flares of disease did you have in the 12 months after faecal transplant?

If you had flares of disease, for how many months were you symptomatic in the 12 months after faecal transplant?

Have you required hospitalisation in the 12 months after faecal transplant?

Yes (how many times: ) No

4. Did you require surgery (colectomy) for your Ulcerative colitis since your faecal transplant

Yes (date:                    )                    No

4. Do you consider that faecal transplantation is likely to be safe?

Impossible    Not likely    Unsure    Quite likely    Very likely

5. How would you compare faecal transplantation to traditional medical treatments of ulcerative colitis?

a) How do you compare the acceptability of these treatments?

b) How do you compare the effectiveness of these treatments?

6. How would you compare faecal transplantation to other treatments such as probiotics?

a) How do you compare the acceptability of these treatments?

b) How do you compare the effectiveness of these treatments?

7. Do you believe faecal transplantation as carried out in this study would be seen as acceptable by

1) The general Australian population?    Yes    No    Unsure

2) Patients with ulcerative colitis?    Yes    No    Unsure

8. Do you have any cultural or religious concerns about receiving faecal material from another person? If yes, what are your concerns?

9 . Do you have any concerns about discussing faecal transplant with friends or family?

If sowhy?

10. If you had your time in the study again would you like any aspects of the faecal transplant process to be done differently?

If yes please elaborate

## eReferences

1. Kozich JJ, Westcott SL, Baxter NT, Highlander SK, Schloss PD. Development of a dual-index sequencing strategy and curation pipeline for analyzing amplicon sequence data on the MiSeq Illumina sequencing platform. *Appl Environ Microbiol* 2013;79:5112-20.
2. Wu L, Wen C, Qin Y, et al. Phasing amplicon sequencing on Illumina Miseq for robust environmental microbial community analysis. *BMC Microbiol* 2015;15:125.
3. Edgar RC. UPARSE: highly accurate OTU sequences from microbial amplicon reads. *Nat Methods* 2013;10:996-8.
4. Cole JR, Wang Q, Fish JA, et al. Ribosomal Database Project: data and tools for high throughput rRNA analysis. *Nucleic Acids Res* 2014;42:D633-42.
5. Hughes PA, Moretta M, Lim A, et al. Immune derived opioidergic inhibition of viscerosensory afferents is decreased in Irritable Bowel Syndrome patients. *Brain Behav Immun* 2014;42:191-203.
6. Campaniello MA, Mavrangelos C, Eade S, et al. Acute colitis chronically alters immuneinfiltrationmechanismsandsensoryneuro-immuneinteractions. *Brain Behav Immun* 2017;60:319-32.
7. Mavrangelos C, Campaniello MA, Andrews JM, Bampton PA, Hughes PA. Longitudinalanalysisindicatessymptom severityinfluences immuneprofile in irritable bowel syndrome. *Gut* 2018;67:398-9.
