# Supplementary material
Source: PubMed Central journal article supplement (PMC6439766)
Supplement: jama-321-156-s003.pdf [file jama-321-156-s003.pdf]

## Data Sharing Statement

Costello. Effect of Fecal Microbiota Transplantation on 8-Week Remission in Patients With Ulcerative Colitis. *JAMA*. Published January 15, 2019. 10.1001/jama.2018.20046

### Data

**Data available:** Yes

**Data types:** Deidentified participant data

**How to access data:** We do not have a repository for the data on line at present. My email address is sam.costello@sa.gov.au

**When available:** With publication

### Supporting Documents

**Document types:** Statistical/analytic code

**How to access documents:** sam.costello@sa.gov.au

**When available:** With publication

### Additional Information

**Who can access the data:** Researchers whose proposed use of the data has been approved.

**Types of analyses:** Systematic review or meta-analysis

**Mechanisms of data availability:** After approval of a proposal

**Any additional restrictions:** Bacterial culture and metagenomic analysis is being conducted on some microbiome specimens at present however these results will not be available with this publication
